# Supplementary material for: Contrasting cellular uptake pathways for chlorido and iodido iminopyridine ruthenium arene anticancer complexes
Source: Royal Society of Chemistry journal article supplement (doi:10.1039/c2mt20189e), 2012-01-01
Supplement: c2mt20189e.pdf [file c2mt20189e.pdf]

Supplementary Information

**Contrasting cellular uptake pathways for chlorido and iodido  
iminopyridine ruthenium arene anticancer complexes**

Isolda Romero-Canelón, Ana M. Pizarro, Abraha Habtemariam, Peter J. Sadler<sup>\*</sup>

*Department of Chemistry, University of Warwick, Coventry CV4 7AL (UK)*

<sup>\*</sup>To whom correspondence should be addressed: [P.J.Sadler@Warwick.ac.uk](mailto:P.J.Sadler@Warwick.ac.uk)

Tables S1 – S11

**Table S1.** Extent of aquation for complexes **1** and **2** after 24 h, using 2 mM solutions of each complex in phosphate buffer (pH 7.2) Each value represents the mean  $\pm$  SD for three independent NMR experiments at 310 K.

| Compound |                                                                                     | % aquation |
|----------|-------------------------------------------------------------------------------------|------------|
| <b>1</b> | [Ru( $\eta^6$ - <i>p</i> -cym)( <i>p</i> -Impy-NMe <sub>2</sub> )Cl]PF <sub>6</sub> | 66 $\pm$ 6 |
| <b>2</b> | [Ru( $\eta^6$ - <i>p</i> -cym)( <i>p</i> -Impy-NMe <sub>2</sub> )I]PF <sub>6</sub>  | 63 $\pm$ 3 |

**Table S2. Time dependence.** Total accumulation of Ru in A2780 cells for complexes **1**, **2** and CDDP after various periods of drug exposure at 310 K with no recovery time. Equipotent concentrations used were CDDP = 0.4  $\mu$ M, **1** = 5  $\mu$ M and **2** = 1  $\mu$ M.

|             | ng Ru/Pt x10 <sup>6</sup> cells |                      |                    |                    |                    |                    |                    |
|-------------|---------------------------------|----------------------|--------------------|--------------------|--------------------|--------------------|--------------------|
|             | Drug exposure time (h)          |                      |                    |                    |                    |                    |                    |
|             | <b>1</b>                        | <b>4</b>             | <b>8</b>           | <b>24</b>          | <b>48</b>          | <b>72</b>          | <b>96</b>          |
| <b>CDDP</b> | 0.0011<br>$\pm$ 0.0001          | 0.014<br>$\pm$ 0.004 | 0.11<br>$\pm$ 0.08 | 0.25<br>$\pm$ 0.03 | 0.29<br>$\pm$ 0.02 | 0.26<br>$\pm$ 0.01 | 0.25<br>$\pm$ 0.02 |
| <b>1</b>    | 1.32<br>$\pm$ 0.09              | 3.5<br>$\pm$ 0.4     | 4.2<br>$\pm$ 0.1   | 7.6<br>$\pm$ 0.8   | 8.9<br>$\pm$ 0.6   | 5.8<br>$\pm$ 0.4   | 4.0<br>$\pm$ 0.2   |
| <b>2</b>    | 6.5<br>$\pm$ 0.4                | 8.2<br>$\pm$ 0.4     | 9<br>$\pm$ 2       | 11<br>$\pm$ 1      | 13.0<br>$\pm$ 0.7  | 10.7<br>$\pm$ 0.3  | 7.4<br>$\pm$ 0.1   |

**Table S3. Temperature dependence.** Total accumulation of Ru in A2780 cells for complexes **1**, **2** and CDDP after 8 h of drug exposure at various temperatures with no recovery time. Equipotent concentrations used were CDDP = 0.4  $\mu$ M, **1** = 5  $\mu$ M and **2** = 1  $\mu$ M.

|             | ng Ru/Pt x10 <sup>6</sup> cells |                   |                 |
|-------------|---------------------------------|-------------------|-----------------|
|             | Temperature (K)                 |                   |                 |
|             | <b>277</b>                      | <b>293</b>        | <b>310</b>      |
| <b>CDDP</b> | N/D                             | 0.005 $\pm$ 0.002 | 0.12 $\pm$ 0.03 |
| <b>1</b>    | 0.14 $\pm$ 0.04                 | 0.61 $\pm$ 0.06   | 4.6 $\pm$ 0.6   |
| <b>2</b>    | 0.8 $\pm$ 0.1                   | 4.1 $\pm$ 0.9     | 10.7 $\pm$ 0.6  |

**Table S4. Concentration dependence.** Total accumulation of Ru in A2780 cells for complexes **1**, **2** and CDDP after 24 h of drug exposure at 310 K with no recovery time.

|             | ng Ru/Pt x10 <sup>6</sup> cells |                         |                        |                        |                        |                        |
|-------------|---------------------------------|-------------------------|------------------------|------------------------|------------------------|------------------------|
|             | Concentration (μM)              |                         |                        |                        |                        |                        |
|             | 0.16 x IC <sub>50</sub>         | 0.33 x IC <sub>50</sub> | 1.6 x IC <sub>50</sub> | 3.2 x IC <sub>50</sub> | 6.4 x IC <sub>50</sub> | 9.6 x IC <sub>50</sub> |
| <b>CDDP</b> | 0.16 ± 0.02                     | 0.28 ± 0.05             | 2.1 ± 0.3              | 4.8 ± 0.5              | 10 ± 1                 | 11 ± 3                 |
| <b>1</b>    | 4.1 ± 0.8                       | 8.0 ± 0.3               | 40 ± 7                 | 95 ± 3                 | N/V                    | N/V                    |
| <b>2</b>    | 5 ± 1                           | 11.4 ± 0.4              | 42 ± 5                 | 57 ± 6                 | N/V                    | N/V                    |

**Table S5. Extent of efflux.** Total accumulation of Ru in A2780 cells for complexes **1** and **2** after 24 h of drug exposure and various recovery times at 310 K. Equipotent concentrations used were CDDP = 0.4 μM, **1** = 5 μM and **2** = 1 μM.

|          | ng Ru/Pt x10 <sup>6</sup> cells |           |           |             |
|----------|---------------------------------|-----------|-----------|-------------|
|          | Recovery Time (h)               |           |           |             |
|          | 0                               | 24        | 48        | 72          |
| <b>1</b> | 7.8 ± 0.1                       | 3.0 ± 0.3 | 1.7 ± 0.1 | 1.7 ± 0.4   |
| <b>2</b> | 11.8 ± 0.8                      | 3.7 ± 0.2 | 2.8 ± 0.3 | 2.79 ± 0.07 |

**Table S6. Inhibition of efflux.** Total accumulation of Ru in A2780 cells for complexes **1** and **2** after 24 h of drug exposure and 24 h of recovery time in drug-free medium that contained various concentrations of verapamil. Equipotent concentrations used were CDDP = 0.4 μM, **1** = 5 μM and **2** = 1 μM.

|          | ng Ru/Pt x10 <sup>6</sup> cells    |                |                |                 |                 |
|----------|------------------------------------|----------------|----------------|-----------------|-----------------|
|          | Cellular Accumulation <sup>A</sup> | Verapamil (μM) |                |                 |                 |
|          |                                    | 0 <sup>B</sup> | 5 <sup>C</sup> | 10 <sup>D</sup> | 20 <sup>E</sup> |
| <b>1</b> | 7.5 ± 0.5                          | 3.0 ± 0.3      | 4.1 ± 0.5      | 4.9 ± 0.2       | 5.3 ± 0.4       |
| <b>2</b> | 11.9 ± 0.8                         | 3.7 ± 0.2      | 4.8 ± 0.3      | 6.1 ± 0.4       | 7.2 ± 0.2       |

**Table S7. Role of Na<sup>+</sup>/K<sup>+</sup> pump in cellular metal accumulation, as a facilitated diffusion endocytosis pathway.** Total accumulation of Ru in A2780 cells when co-incubated with complexes **1**, **2**, CDDP and various concentrations of ouabain after 24 h of drug exposure at 310 K with no recovery time. Equipotent concentrations used were CDDP = 0.4 μM, **1** = 5 μM and **2** = 1 μM.

|             | ng Ru/Pt x10 <sup>6</sup> cells |                |                |                |                |                |
|-------------|---------------------------------|----------------|----------------|----------------|----------------|----------------|
|             | Ouabain (μM)                    |                |                |                |                |                |
|             | 0                               | 5              | 10             | 20             | 100            | 200            |
| <b>CDDP</b> | 0.24<br>± 0.05                  | 0.22<br>± 0.02 | 0.21<br>± 0.04 | 0.27<br>± 0.06 | 0.18<br>± 0.05 | 0.12<br>± 0.03 |
| <b>1</b>    | 7.5<br>± 0.2                    | 5.7<br>± 0.4   | 5.5<br>± 0.2   | 5.1<br>± 0.6   | 4.9<br>± 0.6   | 3.8<br>± 0.3   |
| <b>2</b>    | 11.9<br>± 0.3                   | 9.7<br>± 0.4   | 9.2<br>± 0.3   | 8.9<br>± 0.5   | 8.5<br>± 0.4   | 7.5<br>± 0.2   |

**Table S8. Role of CTR1 in cellular metal accumulation.** Total accumulation of Ru in A2780 cells when co-incubated with complexes **1**, **2**, CDDP and various concentrations of copper(II) chloride after 24 h of drug exposure at 310 K with no recovery time. Equipotent concentrations used were CDDP = 0.4 μM, **1** = 5 μM and **2** = 1 μM.

|             | ng Ru/Pt x10 <sup>6</sup> cells |                |                |                |               |                |
|-------------|---------------------------------|----------------|----------------|----------------|---------------|----------------|
|             | Copper(II) chloride (μM)        |                |                |                |               |                |
|             | 0                               | 10             | 20             | 40             | 100           | 200            |
| <b>CDDP</b> | 0.24<br>± 0.05                  | 0.22<br>± 0.02 | 0.19<br>± 0.03 | 0.15<br>± 0.04 | 0.10<br>± 0.2 | 0.08<br>± 0.01 |
| <b>1</b>    | 7.5<br>± 0.2                    | 7.0<br>± 0.3   | 6.8<br>± 0.5   | 6.7<br>± 0.3   | 5.2<br>± 0.5  | 4.6<br>± 0.3   |
| <b>2</b>    | 11.9<br>± 0.3                   | 11.0<br>± 0.5  | 10.8<br>± 0.2  | 10.1<br>± 0.6  | 9.5<br>± 0.3  | 8.8<br>± 0.4   |

**Table S9. Effect of ATP depletion in cellular metal accumulation.** Total accumulation of Ru in A2780 cells when co-incubated with complexes **1**, **2**, CDDP and 5 μM of antimycin A<sub>1</sub> after 24 h of drug exposure at 310 K with no recovery time. Equipotent concentrations used were CDDP = 0.4 μM, **1** = 5 μM and **2** = 1 μM.

|             | ng Ru/Pt x10 <sup>6</sup> cells |             |
|-------------|---------------------------------|-------------|
|             | Antimycin A <sub>1</sub> (μM)   |             |
|             | 0                               | 5           |
| <b>CDDP</b> | 0.24 ± 0.05                     | 0.22 ± 0.02 |
| <b>1</b>    | 7.5 ± 0.2                       | 32 ± 2      |
| <b>2</b>    | 11.9 ± 0.3                      | 13.6 ± 0.4  |

**Table S10. Membrane disruption by amphotericin B as a model for protein-mediated uptake.** Total accumulation of Ru in A2780 cells when co-incubated with complexes **1**, **2**, CDDP and various concentrations of amphotericin B after 24 h of drug exposure at 310 K with no recovery time. Equipotent concentrations used were CDDP = 0.4  $\mu$ M, **1** = 5  $\mu$ M and **2** = 1  $\mu$ M.

|          | ng Ru/Pt x10 <sup>6</sup> cells |                 |                 |                 |
|----------|---------------------------------|-----------------|-----------------|-----------------|
|          | Amphotericin B ( $\mu$ M)       |                 |                 |                 |
|          | 0                               | 1               | 5               | 10              |
| CDDP     | 0.24 $\pm$ 0.05                 | 0.28 $\pm$ 0.03 | 0.35 $\pm$ 0.05 | 0.49 $\pm$ 0.05 |
| <b>1</b> | 7.5 $\pm$ 0.2                   | 7.7 $\pm$ 0.2   | 9.8 $\pm$ 0.3   | 10.2 $\pm$ 0.5  |
| <b>2</b> | 11.9 $\pm$ 0.3                  | 13.0 $\pm$ 0.4  | 18.5 $\pm$ 0.7  | 25.4 $\pm$ 0.6  |

**Table S11. The role of caveolae endocytotic pathway in metal accumulation.** Total accumulation of Ru in A2780 cells when co-incubated with complexes **1**, **2**, CDDP and various concentrations of  $\beta$ -methyl cyclodextrin after 24 h of drug exposure at 310 K with no recovery time. Equipotent concentrations used were CDDP = 0.4  $\mu$ M, **1** = 5  $\mu$ M and **2** = 1  $\mu$ M.

|          | ng Ru/Pt x10 <sup>6</sup> cells         |                 |                 |                 |                 |
|----------|-----------------------------------------|-----------------|-----------------|-----------------|-----------------|
|          | $\beta$ -methyl cyclodextrin ( $\mu$ M) |                 |                 |                 |                 |
|          | 0                                       | 10              | 20              | 500             | 1000            |
| CDDP     | 0.24 $\pm$ 0.05                         | 0.20 $\pm$ 0.06 | 0.26 $\pm$ 0.03 | 0.23 $\pm$ 0.05 | 0.27 $\pm$ 0.02 |
| <b>1</b> | 7.5 $\pm$ 0.2                           | 7.8 $\pm$ 0.4   | 7.5 $\pm$ 0.2   | 7.6 $\pm$ 0.4   | 7.3 $\pm$ 0.3   |
| <b>2</b> | 11.9 $\pm$ 0.3                          | 11.2 $\pm$ 0.5  | 11.9 $\pm$ 0.5  | 12.2 $\pm$ 0.4  | 12.1 $\pm$ 0.6  |
